# Supplementary material for: Molecular Detection and Genetic Characterization of Ehrlichia ruminantium Harbored by Amblyomma hebraeum Ticks of Domestic Ruminants in North West Province, South Africa
Source: MDPI journal article supplement (doi:10.3390/ani12192511), 2022-09-21
Supplement: s1 [file s1]

# Molecular detection and genetic characterization of *Ehrlichia ruminantium* harboured by *Amblyomma hebraeum* ticks of domestic ruminants in North West province, South Africa

Sifiso S. Mnisi<sup>1</sup>, Malekoba. B. N. Mphuthi<sup>1</sup>, Tsepo Ramatla<sup>2\*</sup>, lehlohonolo Mofokeng<sup>1</sup>, Oriel M. M. Thekisoe<sup>2</sup> and Michela Syakalima<sup>1,3</sup>

1. Department of Animal Health, School of Agricultural Sciences, North-West University, Private Bag X2046, Mmabatho, 2735, South Africa. sifisosiza.mnisi@gmail.com; nthabiseng.mphuthi@nwu.ac.za; mich-san65@gmail.com
2. Unit for Environmental Sciences and Management, North-West University, Private Bag X6001, Potchefstroom 2531, South Africa. thekisoe@gmail.com
3. University of Zambia, School of Veterinary Medicine, Disease Control Department, P.O Box 32379, Lusa-ka, Zambia

**Table S1.** BLASTn of sequence from *dsbA* gene with similar matches with *Ehrlichia ruminantium* from the NCBI.

| Identification | similar sequence from GenBank                                  | Query cover (%) | Percentage identity |
|----------------|----------------------------------------------------------------|-----------------|---------------------|
| NWUe1          | <i>Ehrlichia ruminantium</i> , Kwanyanga. (CP040119.1)         | 96              | 99.7                |
| NWUe2          | <i>Ehrlichia ruminantium</i> , Mara87/7. (CP040118.1)          | 97              | 99.4                |
| NWUe3          | <i>Ehrlichia ruminantium</i> , Nonile. (CP040117.1)            | 97              | 99.7                |
| NWUe4          | <i>Ehrlichia ruminantium</i> , Springbokfontein2. (CP040115.1) | 97              | 99.7                |
| NWUe5          | <i>Ehrlichia ruminantium</i> , Grootvellei. (CP040120.1)       | 97              | 99.4                |
| NWUe6          | <i>Ehrlichia ruminantium</i> , Grootvellei. (CP040120.1)       | 97              | 99.4                |
| NWUe7          | <i>Ehrlichia ruminantium</i> , Kwanyanga. (CP040119.1)         | 96              | 99.4                |
| NWUe8          | <i>Ehrlichia ruminantium</i> , Grootvellei. (CP040120.1)       | 94              | 98.5                |
| NWUe9          | <i>Ehrlichia ruminantium</i> , Springbokfontein4. (CP040114.1) | 90              | 99.7                |
| NWUe10         | <i>Ehrlichia ruminantium</i> , Kwanyanga. (CP040119.1)         | 91              | 98.8                |
| NWUe11         | <i>Ehrlichia ruminantium</i> , Springbokfontein4. (CP040114.1) | 94              | 99.1                |

|        |                                                             |    |      |
|--------|-------------------------------------------------------------|----|------|
| NWUe12 | <i>Ehrlichia ruminantium</i> , Kwanyanga.<br>(CP040119.1)   | 97 | 99.7 |
| NWUe13 | <i>Ehrlichia ruminantium</i> , Mara87/7.<br>(CP040118.1)    | 94 | 99.4 |
| NWUe14 | <i>Ehrlichia ruminantium</i> , Grootvellei.<br>(CP040120.1) | 96 | 99.7 |
| NWUe15 | <i>Ehrlichia ruminantium</i> , Kwanyanga.<br>(CP040119.1)   | 95 | 100  |

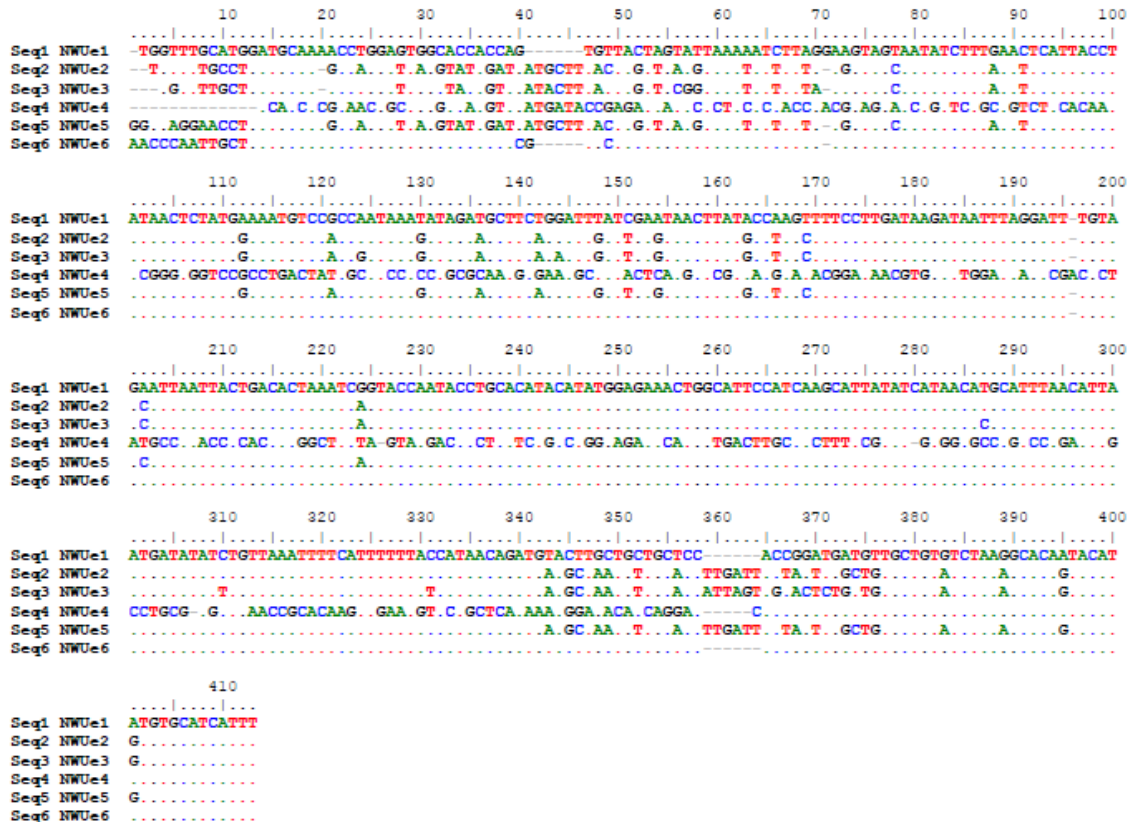

**Figure S1:** Sequence polymorphism among nucleotide sequences of *map-1* from South Africa *Amblyomma haebareum*

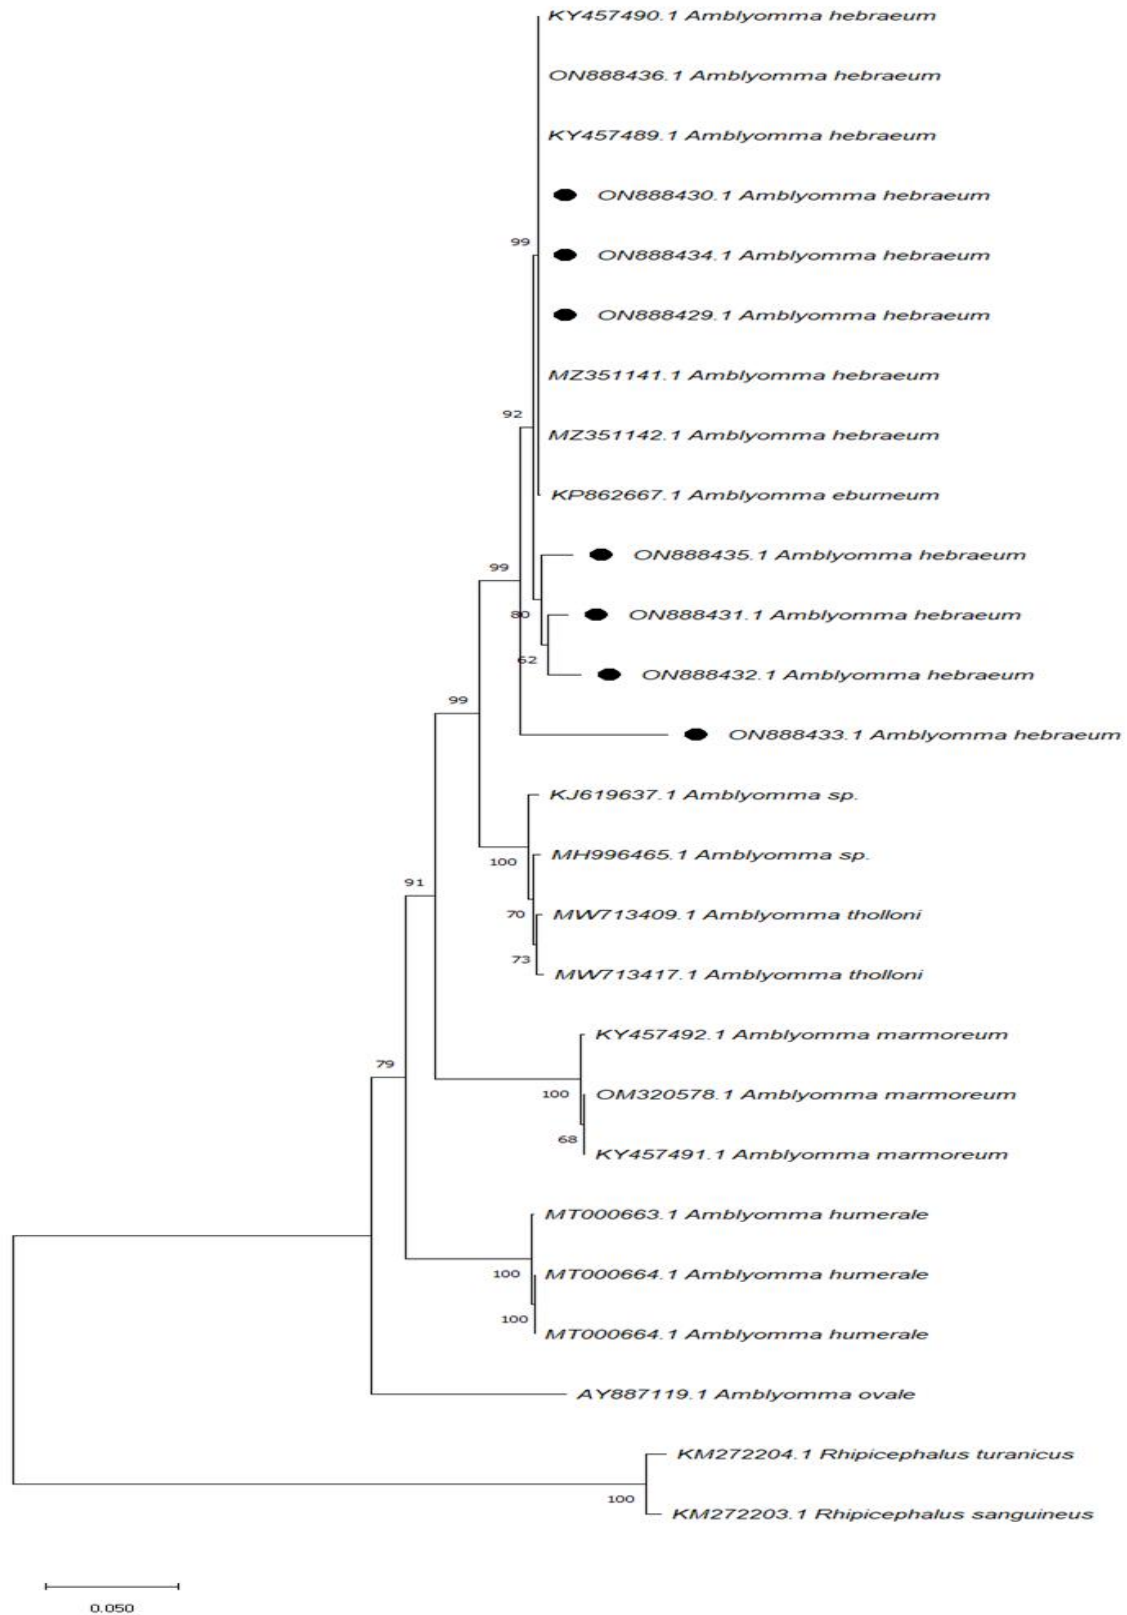

**Figure S2:** Phylogenetic analysis of tick *ITS2* gene using the Maximum Likelihood (ML) method.
